# Supplementary material
Source: PubMed Central journal article supplement (PMC1502431)
Supplement: pnas_0601167103_1.pdf [file pnas_0601167103_1.pdf]

|                 |                                                   |     |
|-----------------|---------------------------------------------------|-----|
| E. coli         | -----MTQVAKKILVTCALPYANGSIHLGHM                   | 26  |
| S. typhimurium  | -----MTQVAKKILVTCALPYANGSIHLGHM                   | 26  |
| V. cholerae     | VLRVVLSQLQFGLYQEKRILSMANDPRKLLVTCALPYANGSIHLGHM   | 74  |
| S. odeinensis   | -----MATSQRKILVTSALPYANGPIHLGHM                   | 26  |
| M. janaschii    | -----MRYLITTALAYTNGPLHLGHA                        | 21  |
| D. radiodurans  | -----MQNPPQHPEAQSPETRDREFFITAAIDYANGTPHIGHV       | 38  |
| M. tuberculosis | -----MKPYYVTTAIAYPNAAPHVGH                        | 22  |
| S. cerevisiae   | -----VKPKDSEILPKPNERNILITSALPYVNNVPHLGNI          | 216 |
| H. sapiens      | AWEKGLLESPLRLPQQNPVLPVAGERNVLITSALPYVNNVPHLGNI    | 284 |
| C. elegans      | -----KKDPKSILPQPGKRNILITAALPYVNNVPHLGNI           | 55  |
|                 |                                                   |     |
| E. coli         | LQQWDISR--DAPYFGFEIPNA--PGKYFYVWLDAPIGYMGsfKnl    | 268 |
| S. typhimurium  | LQQWDISR--DAPYFGFEIPNA--PGKYFYVWLDAPIGYMGsfKnl    | 268 |
| V. cholerae     | LQQWDISR--DAPYFGFEIPGE--KDKFFYVWLDAPIGYMGsfKnl    | 316 |
| S. odeinensis   | LQQWDITR--DAPYFGFEIPDA--PGKYFYVWLDAPIGYMGsfKnl    | 268 |
| M. janaschii    | LHDWDISR--DIS-WGVPiPG---TNQVMYVWLEAPIGYISfTKML    | 261 |
| D. radiodurans  | IGPLSISRPKARVPWGIELPWD--TDHVTYVWFDALLSYLTPLVSQ    | 262 |
| M. tuberculosis | LDDLSISR--TSFDWGVQVPEH--PDHVMYVWVDALTNLYLTGAGFP   | 242 |
| S. cerevisiae   | LKPRCITR---DLVWGTVPVPLEKYKDKVLYVWFDATIGYVSITSNY   | 464 |
| H. sapiens      | LKPRCITR---DLKWGTVPVPLEGFEDKVfYVWFDATIGYLSITANY   | 532 |
| C. elegans      | LDPRCITR---DLKWGTAVPLDGFEEKVfYVWFDAPIGYLSITKCV    | 305 |
|                 |                                                   |     |
| E. coli         | KKDSTAELYHFfIGKDfVYfHSLFWPAMLEGSN-FRKPTNLFVHG-Y   | 326 |
| S. typhimurium  | KKDSDAELYHFfIGKDfVYfHSLFWPAMLEGSN-FRKPTNLFVHG-Y   | 326 |
| V. cholerae     | NKDSKTELYHFfIGKDfVYfHSLFWPAMLDGSG-FRKPTNVFVHG-Y   | 373 |
| S. odeinensis   | AKDSKAeVYHFfIGKDfVYfHSLFWPAMLYGSG-YRQPNSVYAHG-Y   | 325 |
| M. janaschii    | LEK-DTKIYHFfIGKDITVHHAVFVWPGLIAHGfSNLPTAVVSGG-Y   | 313 |
| D. radiodurans  | -----HVIGKDILKPHAVFVWPTMLRAAG-LPLYRRLVVHSHI       | 309 |
| M. tuberculosis | PAD-----LHMIGKDIIRFHAVYWPfLMSAG-IELPRRIFAHG-F     | 292 |
| S. cerevisiae   | NNPEHVSLYQFMGKDNVPFHfTVVfPGSfQLGTEENWTMLHHLNTTEY  | 518 |
| H. sapiens      | KNPEQVDLYQFMAKDNVPFHfSLVfPCSALGAEDNYTLVSHLIATEY   | 586 |
| C. elegans      | KNPENVELFNfVfGKDNVAFHfAVMfPCSfQLGANDNYTVVNNLCATEY | 360 |
